# Supplementary material for: Decoding the Effect of Running on Flavor Perception Changes during Consumption of Sports Drinks
Source: MDPI journal article supplement (doi:10.3390/foods13081266), 2024-04-20
Supplement: s1 [file s1]

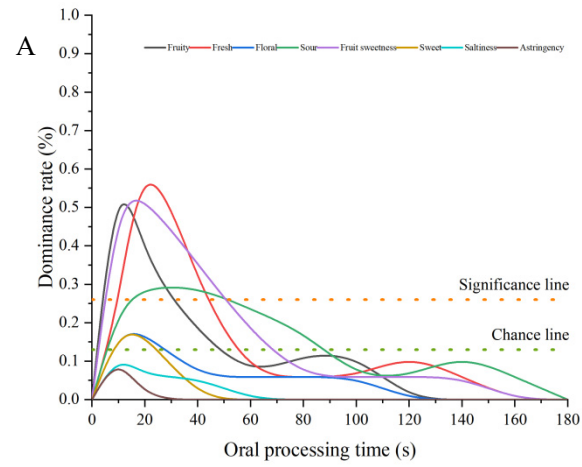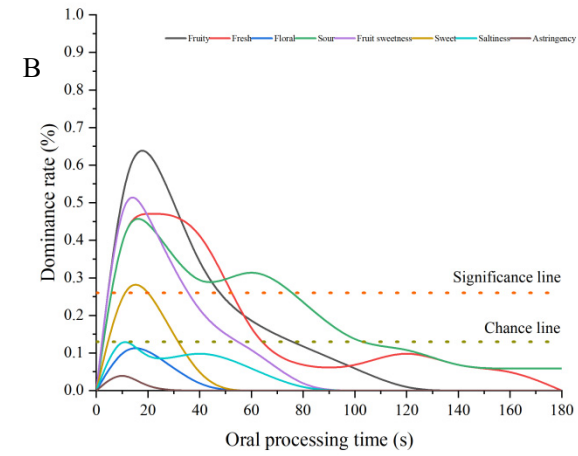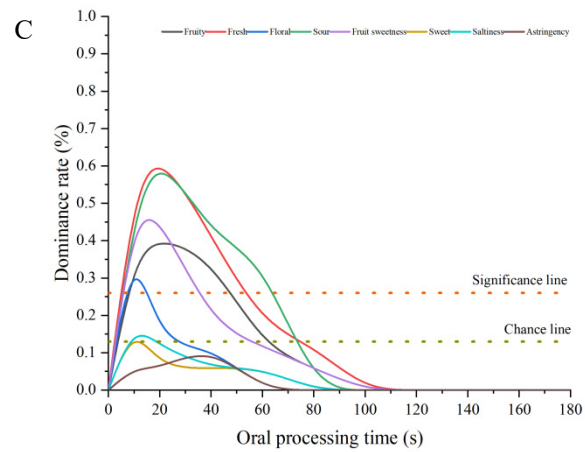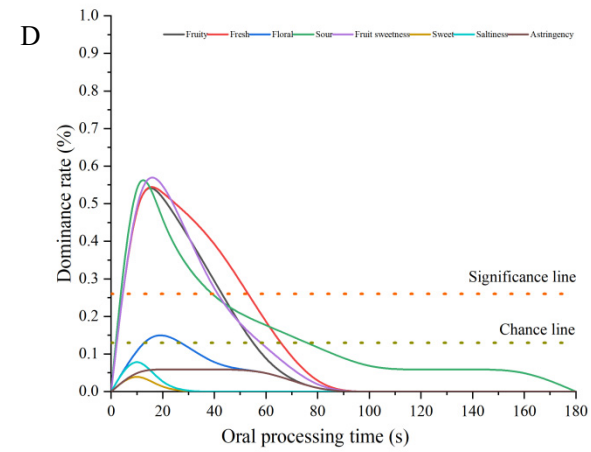

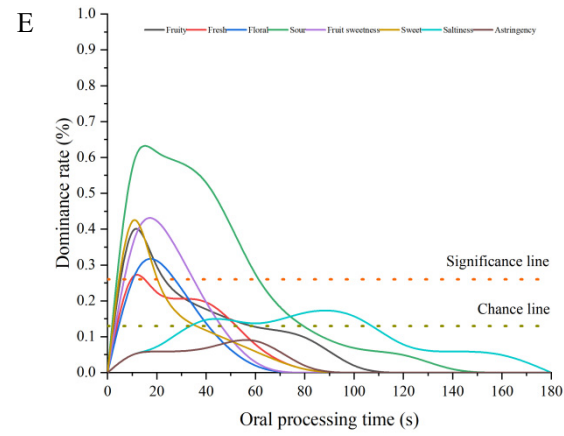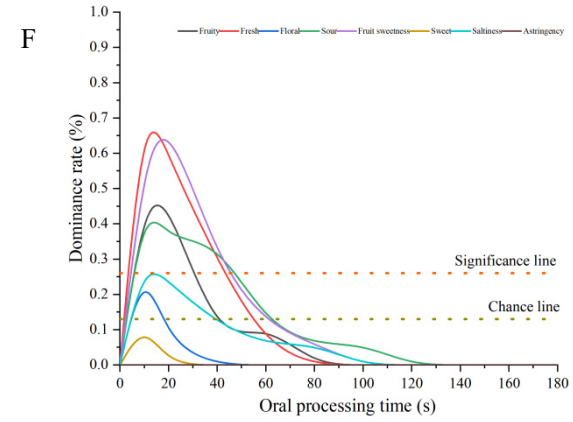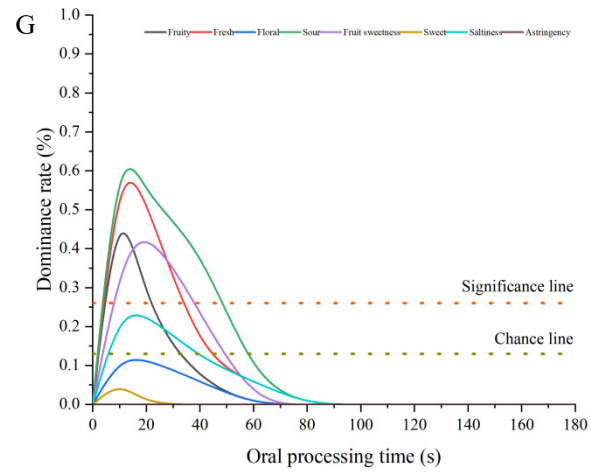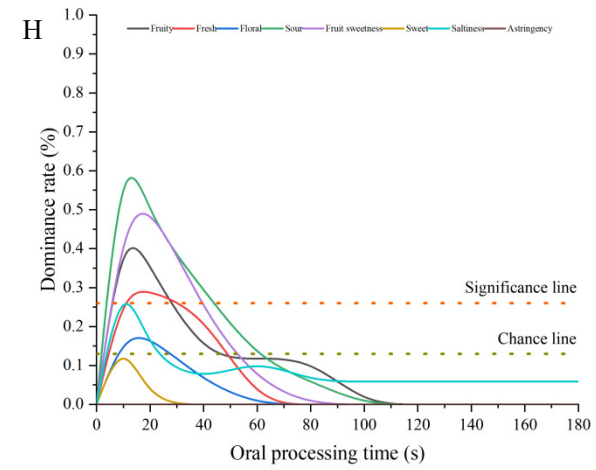

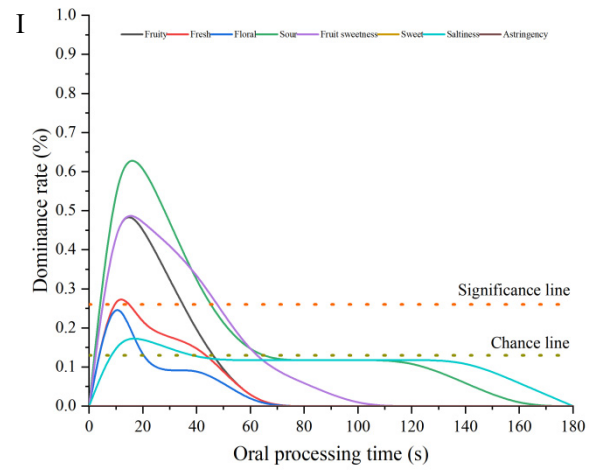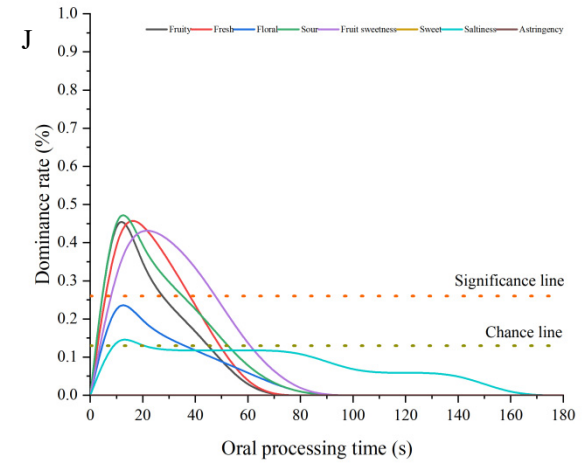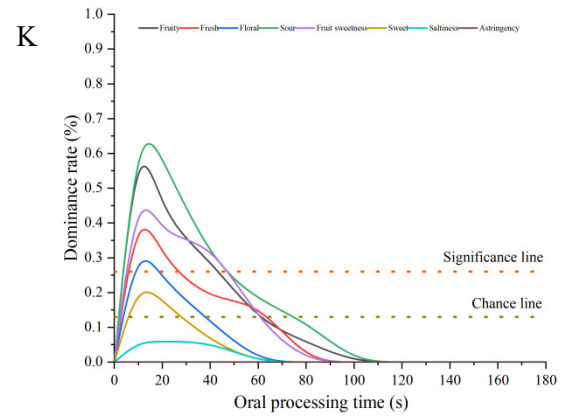

Figure S1. The temporal dominance of sensations results of eleven kinds of sport drink (A, B, C, and D represented the pineapple, peach, orange, and lime flavor of MI, respectively; E, represented the classic flavor of HI-classic flavor; F, Fruity flavor of HA; G, grapefruit flavor of SC; H, Blueberry flavor of GA; I, J, and K represented the Blueberry, Lemon, and Orange flavor of VI, respectively).

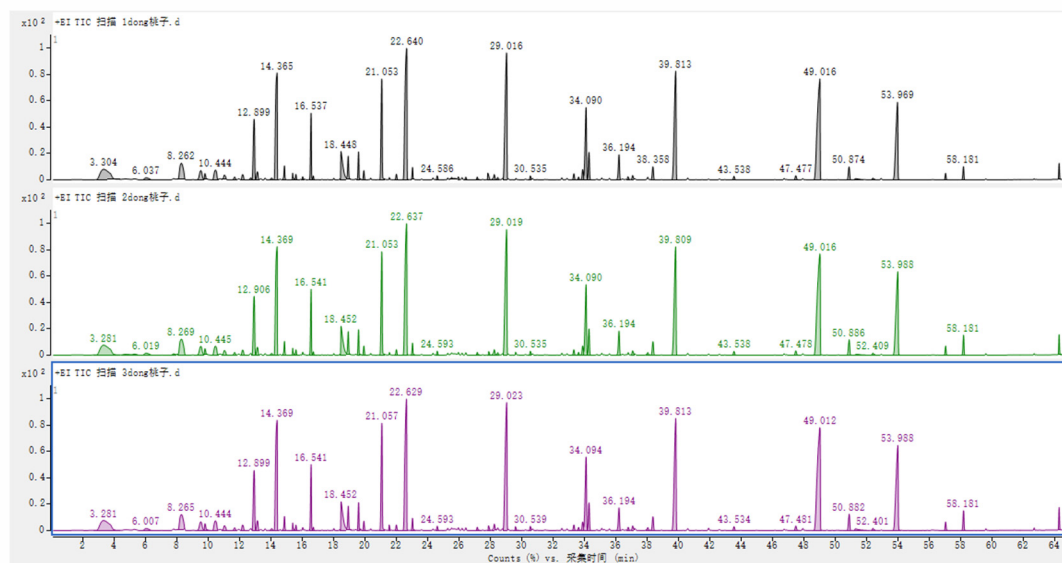

Figure S2. TIC chromatogram of MI-peach
